# Supplementary material for: A Probody T Cell–Engaging Bispecific Antibody Targeting EGFR and CD3 Inhibits Colon Cancer Growth with Limited Toxicity
Source: PubMed Central journal article supplement — Cancer Res. 2022 Sep 16;82(22):4288–98. doi: 10.1158/0008-5472.CAN-21-2483 (PMC9664135; doi:10.1158/0008-5472.can-21-2483), 2022-09-16
Supplement: can-21-2483_supplementary_data_suppsmm_st1-st6_sf1-sf5.pdf [file can-21-2483_supplementary_data_suppsmm_st1-st6_sf1-sf5.pdf]

## Supplemental Methods and Materials

### Plasma Stability

Plasma stability of EGFR Probody therapeutics was determined using a previously described method (44). Briefly, Oregon green-conjugated EGFR Probody therapeutics containing different cleavable linkers were incubated in plasma samples at 37°C for 24 hours. Plasma from a female cynomolgus monkey was incubated with 3  $\mu\text{M}$  Probody therapeutic while 5  $\mu\text{M}$  Probody therapeutic was used for pooled female nu/nu mouse plasma and human male donor plasma. Timepoints were taken at 0 and 24 hours, and Probody light chain cleavage was evaluated by capillary electrophoresis immunoassay with a Wes<sup>TM</sup> Simple Western instrument (ProteinSimple). Activated Probody therapeutic controls were generated by *in vitro* treatment with the protease MT-SP1.

### $k_{\text{cat}}/K_M$ Calculation

1  $\mu\text{M}$  CI107 was incubated with a 1:3 serial dilution of MT-SP1 or MMP2 protease starting at 200 nM in TBST buffer for MT-SP1 and TCNB buffer for MMP2. At 0.5 hour, 1 hour, 2 hours, and 24 hours, samples were removed and light and heavy chain cleavage was evaluated by capillary electrophoresis peak area using a LabChip GXII Touch HT instrument (Perkin Elmer). The fixed ratio of  $k_{\text{cat}}/K_M$  was calculated using a method adapted from Stennicke and Salvesen (45).

### EGFR Receptor Number Quantification

The EGFR receptor number was determined by flow cytometry using an indirect immunofluorescence assay (QIFI Kit, Dako) according to manufacturer's instructions. Detroit-562-Luc2, HCT116-Luc2, HT29-Luc2, and Lovo-Luc2 cells were stained with EGFR.1 mAb (BD Biosciences) at a saturating concentration of 10  $\mu\text{g}/\text{ml}$ . Antibody binding capacity (ABC) was calculated after subtracting signal from the isotype control antibody.

## Supplemental Figures/Tables

**Supplemental Table 1: Protease cleavage kinetics of CI107**

| Probody | Target Arm       | MT-SP1<br>( $\text{M}^{-1}\text{s}^{-1}$ ) | MMP2<br>( $\text{M}^{-1}\text{s}^{-1}$ ) |
|---------|------------------|--------------------------------------------|------------------------------------------|
| CI107   | EGFR<br>Linker 3 | $9.72 \times 10^2$                         | $< 2 \times 10^2$                        |
|         | CD3<br>Linker 4  | N/R                                        | $2.86 \times 10^4$                       |

**Cleavage kinetics of CI107 determined via measurement of  $K_{\text{cat}}/K_M$  using a serine protease and matrix metalloprotease.** CI107 was incubated with MT-SP1 or MMP2 proteases, and light and heavy chain cleavage was evaluated by capillary electrophoresis peak area at 0.5, 1, 2, and 24 hours to calculate the fixed ratio of  $k_{\text{cat}}/K_M$ . N/R, not resolvable.

**Supplemental Table 2: CI107 binding to EGFR and CD3 expressing cells is attenuated**

| Sample    | HT29-Luc2<br>Kd (nM) | HCT116-Luc2<br>Kd (nM) | Jurkat<br>Kd (nM) |
|-----------|----------------------|------------------------|-------------------|
| CI107     | 91.28                | 98.19                  | ND                |
| act-TCB   | 0.17                 | 0.23                   | 0.62              |
| CI128     | NA                   | NA                     | ND                |
| act-CI128 | NA                   | NA                     | 0.57              |

**Masking of EGFR and CD3 binding domains attenuates binding to EGFR and CD3 on the cell surface.** HT29-luc2, HCT116-luc2, and Jurkat cells were incubated with CI107, act-TCB, CI128, or act-CI128 and binding was assessed by flow cytometry. Kd values represent the concentration achieving half maximal binding. NA, not applicable; ND, Kd could not be determined

**Supplemental Table 3: Comparison of Cell Lines and T-cell donors on cytotoxic activity**

|                     | Activated CI107<br>EC <sub>50</sub> (pM) | CI107<br>EC <sub>50</sub> (pM) |
|---------------------|------------------------------------------|--------------------------------|
| HCT116 Donor 4      | 0.44                                     | 7297                           |
| HCT116 Donor A      | 0.50                                     | 4034                           |
| HT29 Donor 4        | 0.25                                     | 3678                           |
| HT29 Donor A        | 0.38                                     | 7193                           |
| Lovo Donor 4        | 0.05                                     | 1131                           |
| Lovo Donor 5        | 0.17                                     | 2013                           |
| Detroit 562 Donor 4 | 0.30                                     | 318.4                          |
| Detroit 562 Donor 5 | 1.29                                     | 976.7                          |

**Masking of EGFR and CD3 binding domains attenuates CI107-mediated cytotoxic effects of PBMCs across donors and cell lines.** HCT116-Luc2, HT29-Luc2, Lovo-Luc2, and Detroit-562-Luc2 cells were co-cultured with human PBMCs from two separate donors and treated with increasing concentrations of CI107 or activated CI107. After 48 hours of culture, cell viability was measured by the ONE-Glo Luciferase Assay, and cytotoxicity was measured relative to untreated controls. EC<sub>50</sub> values represent the concentration achieving half maximal cytotoxicity.

**Supplemental Table 4: T cell activation assay from other donors**

|                | Activated CI107<br>EC <sub>50</sub> (pM) | CI107<br>EC <sub>50</sub> (pM) |
|----------------|------------------------------------------|--------------------------------|
| HCT116 Donor 4 | 7.65                                     | 14178                          |
| HCT116 Donor A | 5.72                                     | ND                             |
| HT29 Donor 4   | 8.75                                     | 65971                          |
| HT29 Donor A   | 1.75                                     | ND                             |

**Masking of EGFR and CD3 binding domains attenuates CI107-mediated T cell activation in PBMCs from a separate donor co-cultured with human colorectal cancer cells.** HCT116-Luc2 and HT29-Luc2 cells were co-cultured with human PBMCs from two separate donors and treated with increasing concentrations of CI107 or activated CI107. After 16 hours of culture, CD69 expression was measured by flow cytometry as a readout of T cell activation. EC<sub>50</sub> values represent the concentration achieving half maximal CD69 expression. The EC<sub>50</sub> values were ambiguous or could not be calculated due to poor curve fit in samples with PBMC Donor A treated with CI107. ND, not determined.

**Supplemental Table 5: Cytokine release assay**

| Analyte       | Donor 4 with HCT116 cells |       | Donor 4 with HT29 cells |       | Donor A with HCT116 cells |       | Donor A with HT29 cells |       |
|---------------|---------------------------|-------|-------------------------|-------|---------------------------|-------|-------------------------|-------|
|               | Act-CI107                 | CI107 | Act-CI107               | CI107 | Act-CI107                 | CI107 | Act-CI107               | CI107 |
| IFN- $\gamma$ | 7.49                      | 17211 | 93.93                   | 67545 | 6.72                      | 84536 | 5.03                    | ND    |
| IL-2          | 11.60                     | 30511 | 24.77                   | 54180 | 6.03                      | 69715 | 5.07                    | 78349 |
| IL-6          | 3.99                      | 22180 | ND                      | ND    | ND                        | ND    | 5.817                   | ND    |
| MCP-1         | 0.98                      | 8360  | 5.58                    | 56778 | 2.65                      | ND    | 1.14                    | ND    |
| TNF- $\alpha$ | 9.36                      | 25193 | 179.2                   | 57414 | 5.84                      | 74082 | 3.38                    | ND    |

**Masking of EGFR and CD3 binding domains attenuates CI107-mediated cytokine release from PBMCs from another donor co-cultured with human colorectal cancer cells.** HCT116-Luc2 and HT29-Luc2 cells were co-cultured with human PBMCs from two separate donors and treated with increasing concentrations of CI107 or activated CI107 (Act-CI107). After 16 hours of culture, cytokine release was measured using a U-PLEX plate. EC<sub>50</sub> values (pm/mL) represent the concentration achieving half maximal cytokine levels. ND indicates EC<sub>50</sub> values that could not be calculated due to poor curve fit, insufficient data to fit a curve, or ambiguous EC<sub>50</sub> values.

**Supplemental Table 6: CI107 provides improved tolerability relative to Act-TCB in cynomolgus monkeys.**

| <b>TCB</b> | <b>Dose (mg/kg)</b> | <b>Clinical Observations</b>                                   |
|------------|---------------------|----------------------------------------------------------------|
| Act-TCB    | <b>0.06 (MTD)</b>   | Emesis, hunched posture                                        |
| Act-TCB    | 0.18                | Emesis, hunched posture, inappetence, pale and thin appearance |
| CI107      | 0.6                 | None                                                           |
| CI107      | 2.0                 | Emesis                                                         |
| CI107      | <b>4.0 (MTD)</b>    | Emesis, inappetence                                            |
| CI107      | 6.0                 | Not tolerated                                                  |

Severity of clinical signs observed after dosing were recorded following a single dose of 0.06 mg/kg or 0.18 mg/kg of activated TCB (Act-TCB) on Day 1 or 0.6 mg/kg, 2.0 mg/kg, 4.0 mg/kg, or 6.0 mg/kg CI107.

### Supplemental Figure 1: Cytotoxicity of Act-CI107 is comparable to Act-CI104

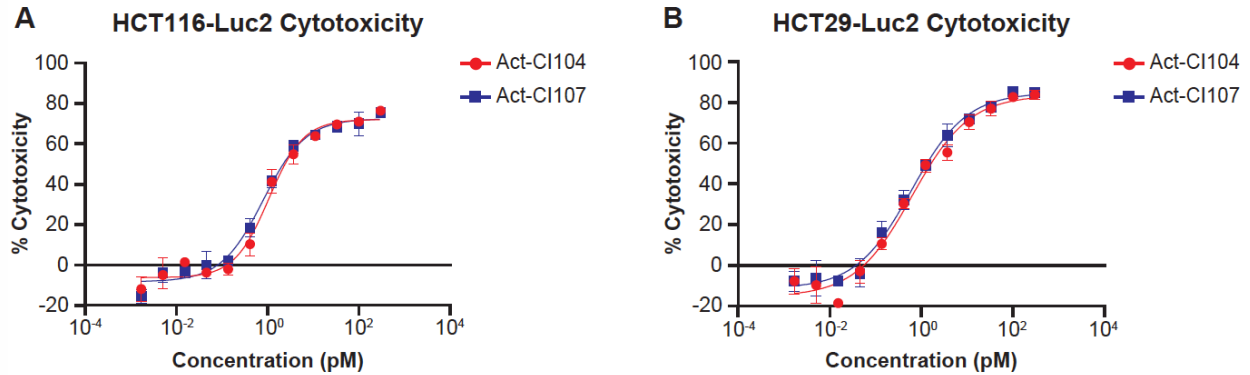

**Cytotoxicity of Act-CI107 is comparable to Act-CI104.** HCT116-Luc2 and HT29-Luc2 cells were co-cultured with human PBMCs and treated with increasing concentrations of activated CI104 (Act-104) or activated CI107 (Act-CI107). After 48 hours of culture, cell viability of HCT116-Luc2 (**A**) or HT29-Luc2 (**B**) was measured by the ONE-Glo Luciferase Assay, and % cytotoxicity was calculated.

### Supplemental Figure 2: Plasma stability of protease substrates used in Probody TCBS

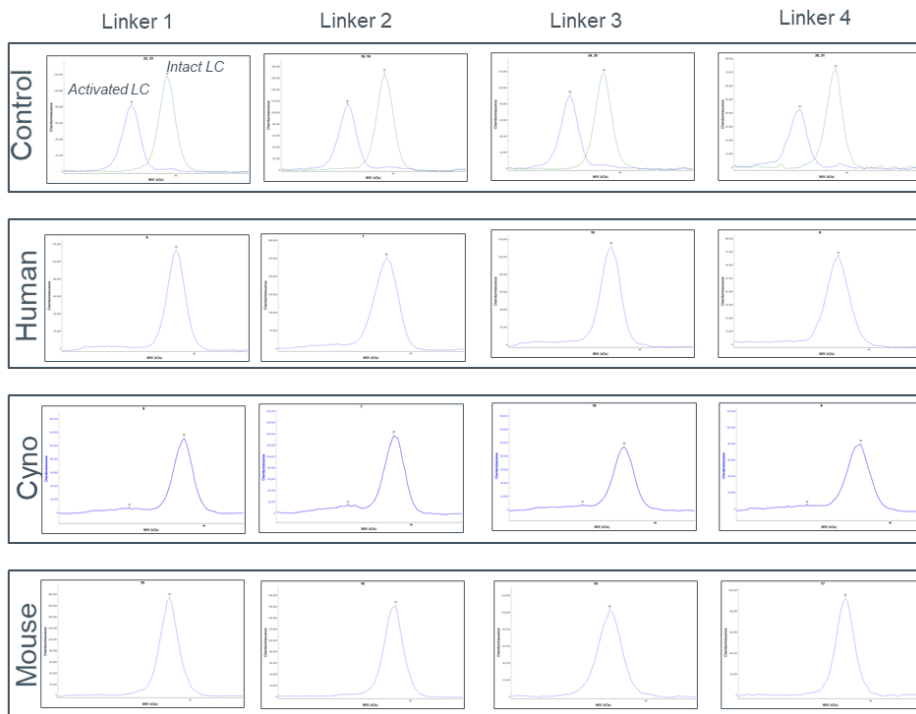

| Substrate | % Cleavage |           |            |
|-----------|------------|-----------|------------|
|           | Mouse 24 h | Cyno 24 h | Human 24 h |
| Linker 1  | 0.0        | 0.0       | 0.0        |
| Linker 2  | 0.0        | 0.0       | 0.0        |
| Linker 3  | 0.0        | 0.0       | 0.0        |
| Linker 4  | 0.0        | 0.0       | 0.0        |

**EGFR Proboddy therapeutics have similar plasma stability.** Plasma stability of EGFR Proboddy therapeutics containing cleavable linkers used in Proboddy TCB molecules CI011, CI040, and CI107 is comparable in human, cynomolgus monkey (cyno), and mouse plasma. No Proboddy activation was observed at 24 hours.

**Supplemental Figure 3: CI107 binding is attenuated in additional EGFR-expressing cell lines**

**A**

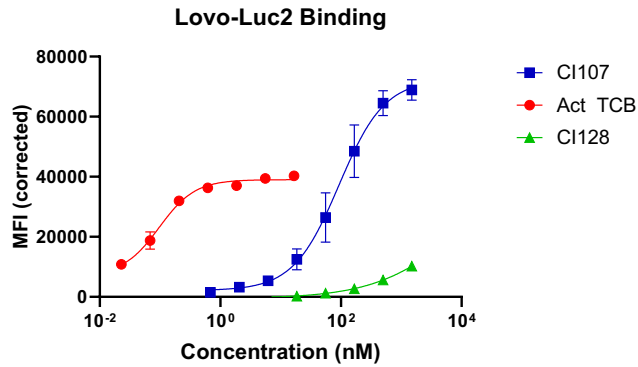

| Sample  | Kd (nM) |
|---------|---------|
| CI107   | 92.89   |
| Act-TCB | 0.10    |
| CI128   | NA      |

**B**

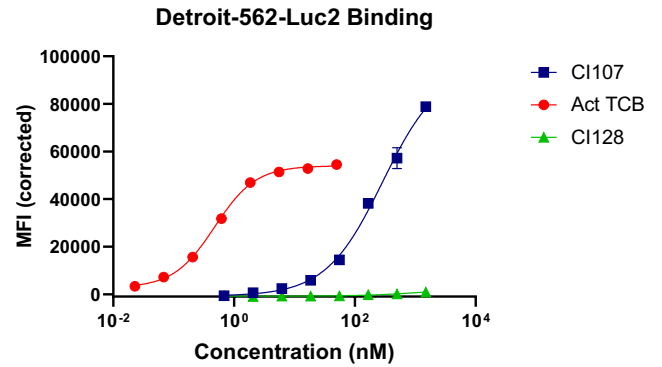

| Sample  | Kd (nM) |
|---------|---------|
| CI107   | 288.8   |
| Act-TCB | 0.48    |
| CI128   | NA      |

**C**

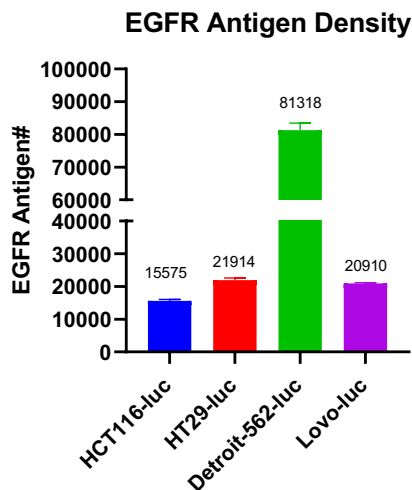

**CI107 binding is attenuated across cell lines.** Lovo (A) or Detroit-562 cells (B) were incubated with CI107 or protease-activated TCB (Act-TCB), and binding was assessed by flow cytometry. (C) EGFR expression levels for cell lines used in these experiments was quantified via QIFIKIT®. MFI, mean fluorescence intensity.

**Supplemental Figure 4: EGFR and CD3 binding of additional Probody TCB molecules**

**A**

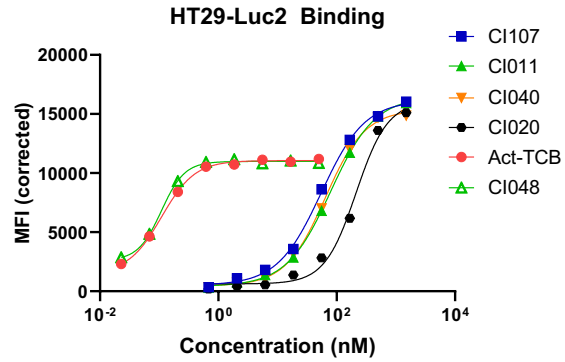

| Sample  | Kd (nM) |
|---------|---------|
| CI107   | 54.79   |
| CI011   | 79.06   |
| CI040   | 64.17   |
| CI020   | 213.2   |
| Act-TCB | 0.11    |
| CI048   | 0.11    |

**B**

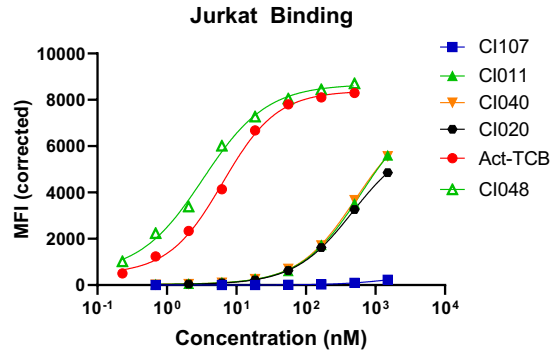

| Sample  | Kd (nM) |
|---------|---------|
| CI107   | N/A     |
| CI011   | 619.6   |
| CI040   | 506.6   |
| CI020   | 467.9   |
| Act-TCB | 6.36    |
| CI048   | 3.30    |

**Binding of CI011, CI020, and CI040 to EGFR and CD3 is attenuated relative to protease-activated TCB.** HT29-Luc2 (A) or Jurkat (B) cells were incubated with Probody TCBs or protease-activated TCBs, and binding was assessed by flow cytometry. MFI, mean fluorescence intensity.



**Supplemental Figure 5: Cytotoxic activity of additional Probody TCB molecules**

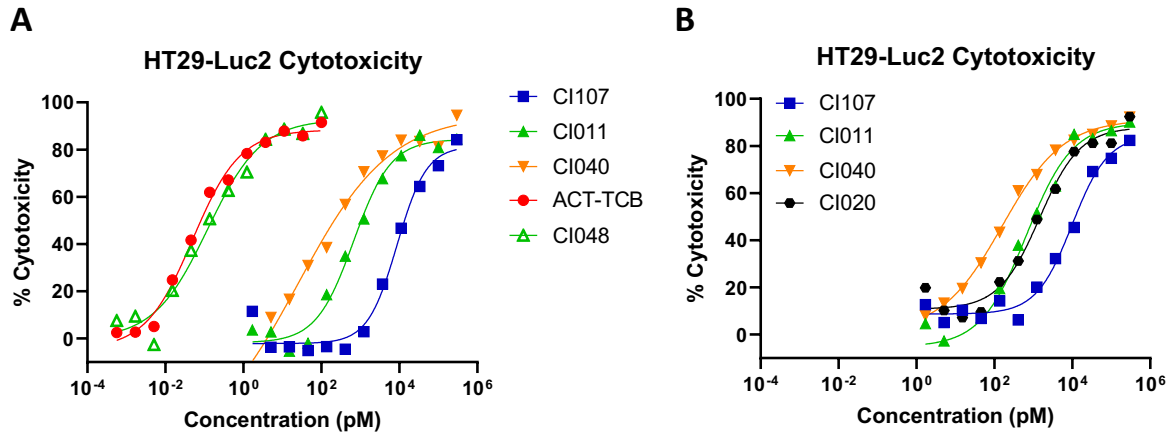

| Sample  | Donor 2 | Donor 4 |
|---------|---------|---------|
| CI107   | 5355    | 8760    |
| CI011   | 397.5   | 673.5   |
| CI040   | 105.7   | 25.48   |
| Act-TCB | 0.03    | 0.05    |
| CI048   | 0.10    | 0.12    |

| Sample | Donor 2 | Donor 4 |
|--------|---------|---------|
| CI107  | 6240    | 9917    |
| CI011  | 230.2   | 670.5   |
| CI040  | 103.4   | 160     |
| CI020  | 568.4   | 1441    |

**Cytotoxic activity of CI011, CI020, and CI040 is attenuated relative to protease-activated TCB.** HT29-Luc2 cells were co-cultured with human PBMCs from two donors and treated with increasing concentrations of Probody TCB (CI011, CI020, CI040, CI107) or protease-activated TCB (Act-TCB, CI048). After 48 hours of culture, HT29-Luc2 cell viability was measured by the ONE-Glo Luciferase Assay, and % cytotoxicity was calculated. Data from donor 4 are graphed. **(A)** Cytotoxic activity of protease cleavable Probody TCBs and protease-activated TCBs. **(B)** Cytotoxic activity of protease cleavable and non-cleavable Probody TCBs.
